# Supplementary material for: CB2 Receptor Stimulation and Dexamethasone Restore the Anti-Inflammatory and Immune-Regulatory Properties of Mesenchymal Stromal Cells of Children with Immune Thrombocytopenia
Source: PubMed Central journal article supplement (PMC6429305; doi:10.3390/ijms20051049), 2019-02-28
Supplement: ijms-20-01049-s001.pdf [file ijms-20-01049-s001.pdf]

# CB2 Receptor Stimulation and Dexamethasone Restore the Anti-Inflammatory and Immune-Regulatory Properties of Mesenchymal Stromal Cells of Children with Immune Thrombocytopenia

## Supplementary Materials

**Table S1.** Annexin-V and PI double-stained Apoptosis Assay, in MSCs derived from 2 ITP patients after 24h treatments with JWH-133 [2,5  $\mu$ M] and AM630 [1  $\mu$ M], alone and in combination. The table shows the percentage of total apoptotic cells. A Wilcoxon test has been used for statistical analysis.  $p \leq 0.05$  has been considered statistically significant. \* vs NT (NT).

| Samples   | Percentage of total apoptotic ITP-MSCs |         |        |        |
|-----------|----------------------------------------|---------|--------|--------|
|           | Treatments                             |         |        |        |
|           | NT                                     | JWH-133 | AM630  | J+A    |
| MSC ITP-1 | 45,88                                  | 30,59*  | 52,01* | 55,36* |
| MSC ITP-2 | 46,22                                  | 31,70*  | 53,60* | 55,90* |

**Table S2.** (A) Viability of T cells co-cultured with ITP-MSCs estimated by a cytofluorimetric assay after 24h treatment with JWH-133 [2,5  $\mu$ M] and AM630 [1  $\mu$ M], alone and in combination. The table shows the results, as cell number per  $10^6$ . A Wilcoxon test has been used for statistical analysis.  $p \leq 0.05$  has been considered statistically significant. \* vs T cells+MSC (B) TNF- $\alpha$  release by ITP-MSCs and T cells investigated by ELISA assay after 24h treatment JWH-133 [2,5  $\mu$ M] and AM630 [1  $\mu$ M], alone or in combination. The table shows the concentrations [pg/mL] of TNF- $\alpha$ . A Wilcoxon test has been used for statistical analysis.  $p \leq 0.05$  has been considered statistically significant. \* vs MSC.

A)

| Sample 1             | T Cell Viability |             |                        |                      |                    |
|----------------------|------------------|-------------|------------------------|----------------------|--------------------|
|                      | T cells          | T cells+MSC | T cells+MSC<br>JWH-133 | T cells+MSC<br>AM630 | T cells+MSC<br>J+A |
| (n° cells X $10^6$ ) | 5,86             | 6,26        | 4,36*                  | 6,61                 | 6,62               |
| Sample 2             | T cells          | T cells+MSC | T cells+MSC<br>JWH-133 | T cells+MSC<br>AM630 | T cells+MSC<br>J+A |
| (n° cells X $10^6$ ) | 5,74             | 6,18        | 4,43*                  | 6,58                 | 6,38               |

B)

| Sample 1 | TNF- $\alpha$ |             |             |                    |
|----------|---------------|-------------|-------------|--------------------|
|          | MSC-ITP NT    | MSC+LPS     | T cells     | T cells+LPS        |
| pg/mL    | 0,51          | 0,99*       | 5,88*       | 7,62*              |
| Sample 2 | T cells       | T cells+MSC | T cells+LPS | T cells+MSC<br>LPS |
| pg/mL    | 0,39          | 1,08*       | 5,67*       | 7,86*              |
